# Supplementary material for: Persistence, Dose Titration, and Health Care Resource Utilization Among Crohn’s Disease Patients Treated With Ustekinumab: A Real-World Analysis in the United States
Source: Springer Nature journal article supplement (doi:10.1007/s12325-020-01276-3), 2020-03-19
Supplement: MOESM1 [file 17815692]

**Supplemental Figure 1. Modified Algorithm to Identify Patients**


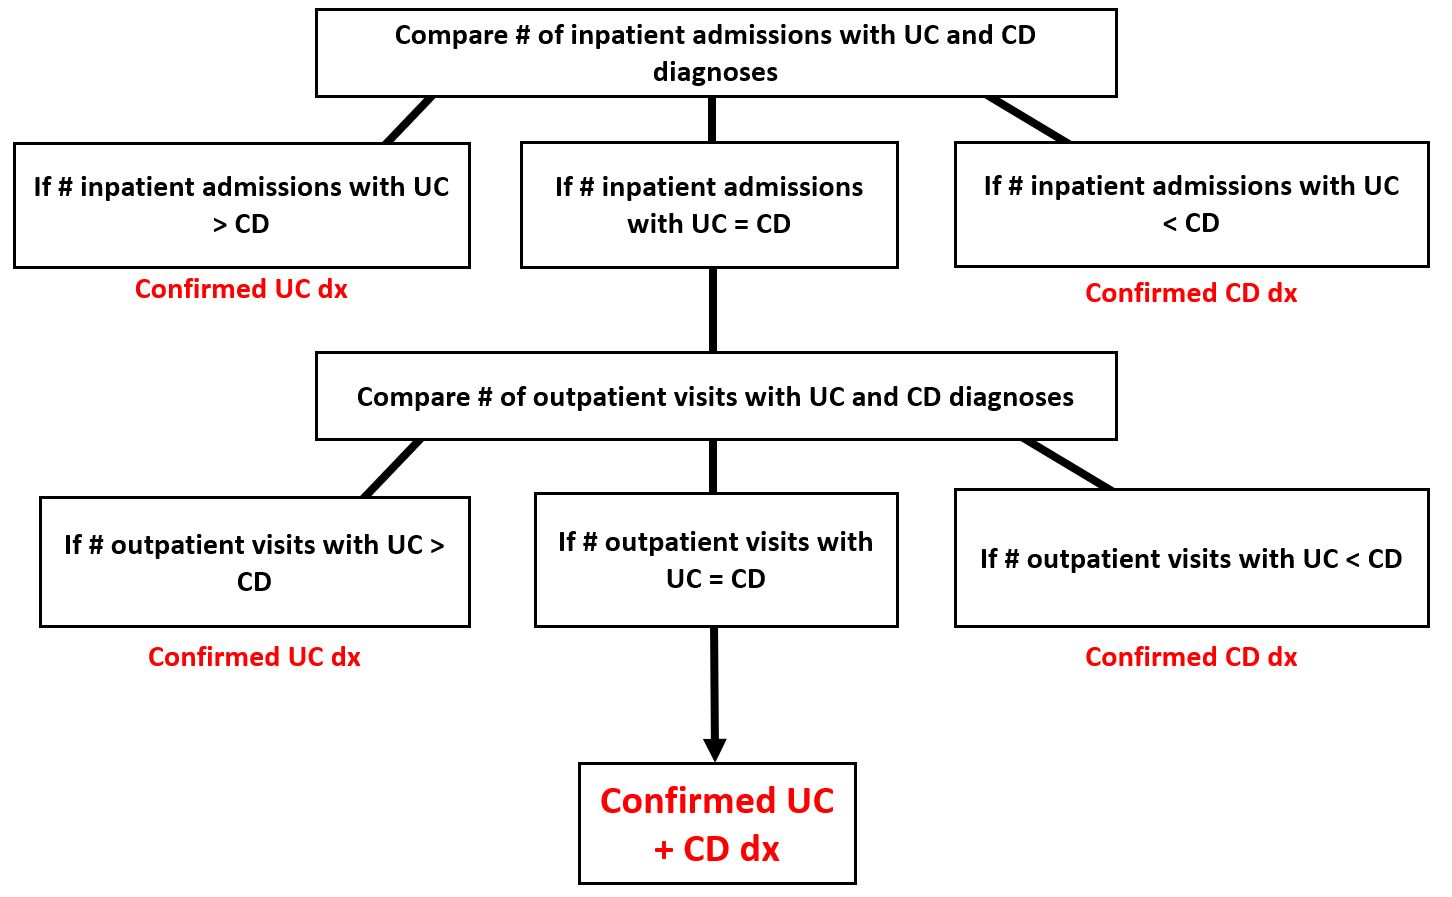


CD: Crohn's disease; Dx: diagnosis; UC: ulcerative colitis.
